# Supplementary material for: Prognostic value of total number of lymph nodes retrieved differs between left-sided colon cancer and right-sided colon cancer in stage III patients with colon cancer
Source: PubMed Central journal article supplement (PMC5948673; doi:10.1186/s12885-018-4431-5), 2018-05-11

Figure S2

A

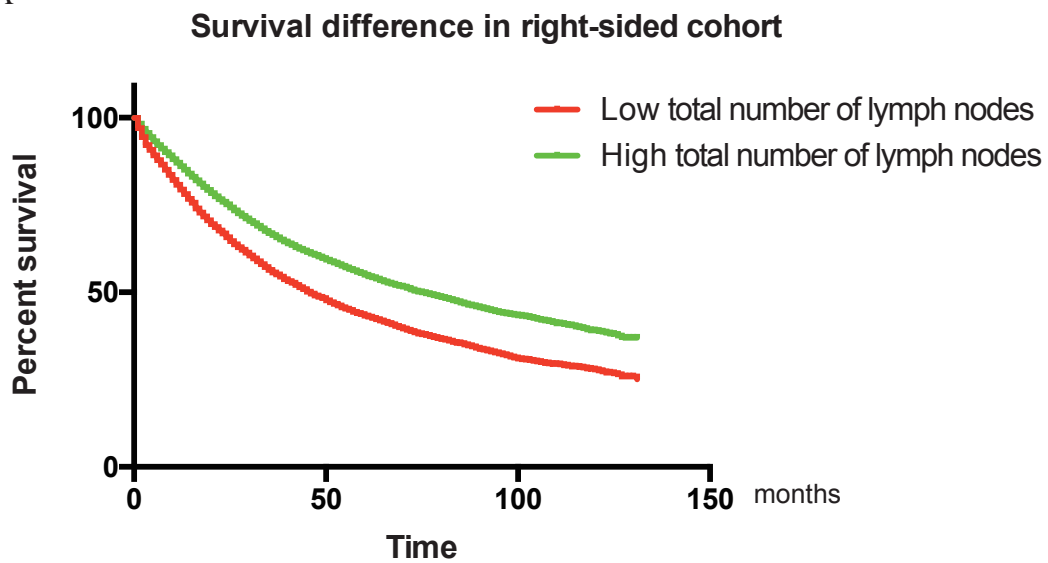

B

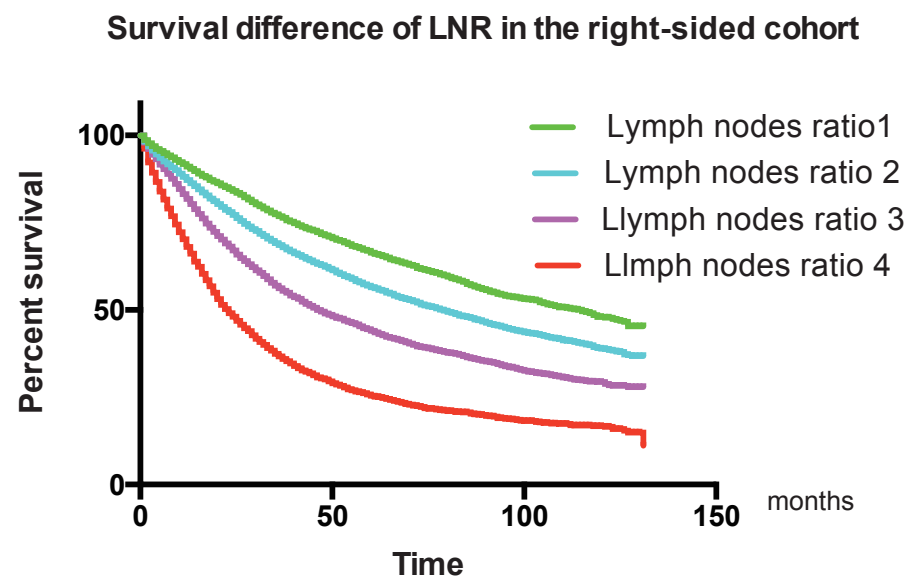

**Survival difference in lymph nodes ratio 1 of the right-sided**

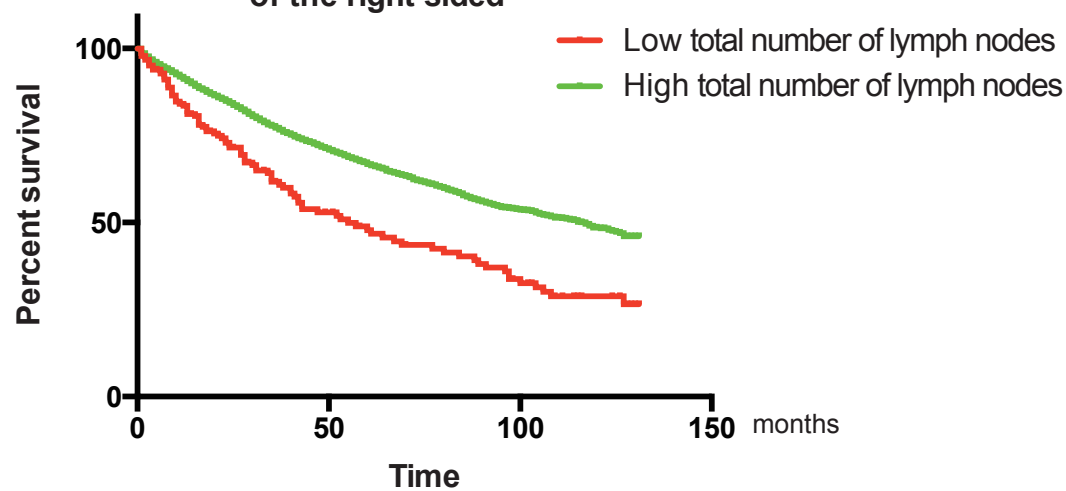

D

**Survival difference in lymph nodes ratio 2 of the right-sided**

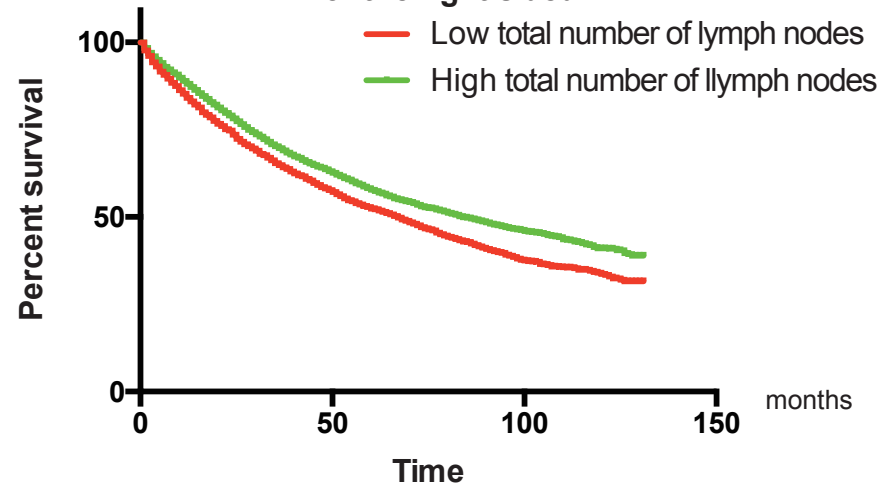

E

**Survival difference in lymph nodes 3 of right-sided**

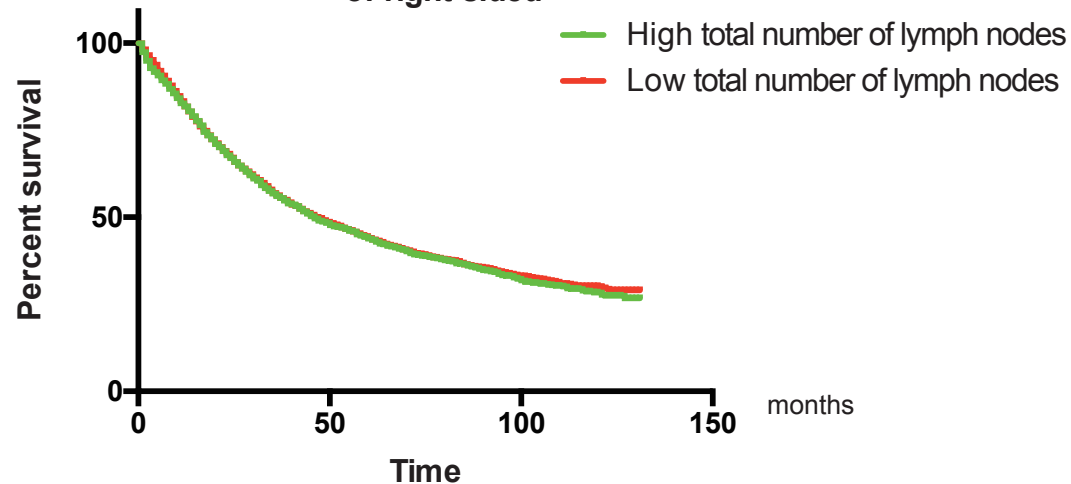

Fm

**Survival difference in lymph nodes 4 of the right-sided**

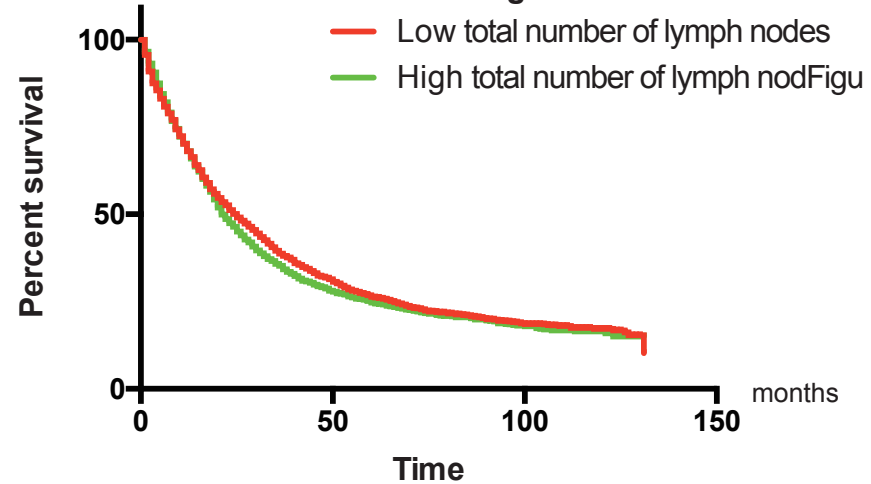

Supplement: 12885_2018_4431_MOESM2_ESM.pdf [file 12885_2018_4431_MOESM2_ESM.pdf]
